# Supplementary material
Source: PubMed Central journal article supplement (PMC9640270)

## SUPPLEMENTARY MATERIAL

### Targeted suppression of miRNA-33 using pHILIP improves atherosclerosis regression

Xinbo Zhang, Noemi Rotllan, Alberto Canfrán-Duque, Jonathan Sun, Jakub Toczek, Anna Moshnikova, Shipra Malik, Nathan L. Price, Elisa Araldi, Wen Zhong, Mehran M. Sadeghi, Oleg A. Andreev, Raman Bahal, Yana Reshetnyak, Yajaira Suárez, Carlos Fernández-Hernando.

#### SUPPLEMENTAL FIGURE LEGENDS

**Figure S1. pH low inducible peptides (pHLIP) are highly internalized in atherosclerotic plaques.** **A-B**, Representative images (**A**) and quantification (**B**) of tissues from low density lipoprotein receptor knockout (*Ldlr*<sup>-/-</sup>) mice injected with fluorescently labeled targeted (A546-Var3) or non-inserting control (A546-5K-Var3) constructs. *Ldlr*<sup>-/-</sup> mice were fed a western diet (WD) for 3 months to induce atherosclerosis and tissues were harvested 4-24 hours post injection of constructs. **C**, Representative images demonstrating uptake of A546-Var3 into liver and kidney with A546-5K-Var3 as control. Scale bar: 100  $\mu$ m.

**Figure S2. pH low insertion peptides (pHLIP) do not target CD45<sup>-</sup> cells in atherosclerotic plaques.** **A**, Representative flow cytometry histograms showing fluorescence intensities in CD45<sup>-</sup> cells isolated from atherosclerotic lesions of mice injected with PBS, A546-5K-Var3 or A546-Var3 constructs. **B**, Quantification of the median fluorescence intensity [MFI; arbitrary units (a.u.)] and % of A546<sup>+</sup> CD45<sup>-</sup> cells is shown in right panels. Quantification represents the mean  $\pm$  SEM (n=4 in A546-5K-Var3 and n=5 in A546-Var3 group). Data normality was assessed using Shapiro-Wilk test and analyzed by an unpaired two-sided Student's t-test.

**Figure S3. pH low inducible peptides (pHLIP) are not internalized by spleen and lung monocytes from hypercholesterolemic mice.** *Ldlr*<sup>-/-</sup> mice were fed a western diet (WD) for 3 months to induce atherosclerosis and tissues were harvested 4 hours post injection of constructs. **A**, Representative images of tissues from low density lipoprotein receptor knockout (*Ldlr*<sup>-/-</sup>) mice injected with fluorescently labeled targeted (A750-Var3) or non-inserting control (A750-5K-Var3) constructs. **B**, Representative flow cytometry histograms of fluorescence intensities in spleen and lung monocytes from mice injected with A546-5K-Var3 (control) or A546-Var3 constructs.

**Figure S4. Selective targeting of miR-33-5p using pHLIP does not affect cellular viability and lipid uptake but increases cholesterol efflux in macrophages.** **A-B**, anti-miR-33-5p peptide nucleic acid delivery vector (anti-miR33<sup>pHLIP</sup>) does not influence cellular viability measured by MTT analysis (**A**) and Dil-labeled acetylated low-density lipoprotein (Dil-Ac-LDL, 10 mg/ml) uptake under neutral (pH 7.4) and acidic (pH 6.2) conditions (**B**). **C**, anti-miR33<sup>pHLIP</sup> uptake increased cholesterol efflux to apolipoprotein A1 (ApoA1) in macrophages cultured in neutral (pH 7.4) and acidic (pH 6.2) conditions. **D**, pHLIP uptake in foamy and non-foamy macrophages isolated from low-density lipoprotein receptor knockout (*Ldlr*<sup>-/-</sup>) mice fed a chow diet (CD) and western diet (WD) and injected with fluorescently labeled targeted (A633-Var3) peptide. **E**, % of pHLIP (A633-Var3) positive macrophages from *Ldlr*<sup>-/-</sup> mice fed with a WD compared to animals fed with a CD. Quantification represents the mean ± SEM (n= 3 per group). Data were analyzed by one-way ANOVA (**A** and **B**), two-way ANOVA (**C**) with Bonferroni correction for multiple comparisons or a nonparametric Mann-Whitney test after data normality analysis using Shapiro-Wilk test (**D** and **E**).

**Figure S5. miR-33 silencing using anti-miR33<sup>pHLIP</sup> enhances ABCA1 expression and attenuates neutral lipid accumulation in human macrophages derived from THP-1 cells.** **A**, Flow cytometry analysis showing the uptake of A633-5K-Var3 (con) or A633-Var3 constructs in

THP-1 cells. MFI: median fluorescence intensity. **B**, Representative Oil-red O (ORO) staining of THP-1 macrophages treated with anti-miR-33<sup>pHLIP</sup> or Scr<sup>pHLIP</sup> and incubated with acetylated low-density lipoprotein (Ac-LDL). Quantification of lipid accumulation is shown in the right panel. **C**, Representative Western blot analysis of ABCA1 in THP-1-derived macrophages incubated with anti-miR-33<sup>pHLIP</sup> or Scr<sup>pHLIP</sup> for 24 and 48 hours. Quantification shown in the right panel. Quantification represents the mean  $\pm$  SEM (n= 3 per group). Data were analyzed by a nonparametric Mann-Whitney test (**A** and **B**) or two-way ANOVA (**C**) with Bonferroni correction for multiple comparisons or after data normality analysis using Shapiro-Wilk test.

**Figure S6. Targeted silencing of miR-33-5p does not influence circulating lipids, lipoprotein profiles and body weight.** **A**, Plasma total cholesterol, high density lipoprotein (HDL) cholesterol and triglycerides from low-density lipoprotein receptor knockout (*Ldlr*<sup>-/-</sup>) mice injected with anti-miR33<sup>pHLIP</sup> or Scr<sup>pHLIP</sup> (n=17 in Baseline, n=13 in Scr<sup>pHLIP</sup> and anti-miR-33<sup>pHLIP</sup> group). **B**, FPLC analysis of circulating lipoproteins from *Ldlr*<sup>-/-</sup> mice injected anti-miR33<sup>pHLIP</sup> or Scr<sup>pHLIP</sup>. **C**, Body weight of *Ldlr*<sup>-/-</sup> mice injected anti-miR33<sup>pHLIP</sup> or Scr<sup>pHLIP</sup> (n=17 in Baseline, n=13 in Scr<sup>pHLIP</sup> and n=14 in anti-miR-33<sup>pHLIP</sup> group). Quantification represents the mean  $\pm$  SEM. Data were analyzed by one-way ANOVA with Bonferroni correction for multiple comparisons.

**Figure S7. Selective targeting of miR-33-5p using pHLIP peptides does not affect circulating leukocytes and hepatic function.** **A**, Quantification of peripheral blood counts by hemocytometer from *Ldlr*<sup>-/-</sup> mice injected with anti-miR33<sup>pHLIP</sup> or scrambled control Scr<sup>pHLIP</sup> (n=8 per group). **B**, Quantification of serum hepatotoxicity markers, aspartate aminotransferase (AST) and alanine aminotransferase (ALT), from *Ldlr*<sup>-/-</sup> mice injected anti-miR33<sup>pHLIP</sup> or Scr<sup>pHLIP</sup> (n=7 per group). Quantification represents the mean  $\pm$  SEM. Data were analyzed by two-way ANOVA with

Bonferroni correction for multiple comparisons (**A**) and an unpaired two-sided Student's t-test after data normality analysis using Shapiro-Wilk test (**B**).

**Figure S8. Antagonist miR-33 expression using anti-miR33<sup>pHLIP</sup> does not influence hepatic ABCA1 and ABCG1 expression.** **A**, miR-33 expression in liver, spleen, lung and kidney isolated from *Ldlr*<sup>-/-</sup> mice injected intravenously with anti-miR33<sup>pHLIP</sup> or Scr<sup>pHLIP</sup> at a dose of 1 mg/kg body weight (*n*= 4 in Scr<sup>pHLIP</sup> and *n*=6 in anti-miR33<sup>pHLIP</sup> group). **B**, Representative Western blot analysis of ABCA1 and ABCG1 in the liver, spleen, lung, and kidney from *Ldlr*<sup>-/-</sup> mice injected with anti-miR-33-5p<sup>pHLIP</sup> or Scr<sup>pHLIP</sup>. Quantification is shown in the bottom panels (*n*=5). Data normality was assessed using Shapiro-Wilk test and analyzed by an unpaired two-sided Student's t-test. Quantification represents the mean ± SEM.

**Figure S9. scRNA-Seq analysis of aortic cells from *Ldlr*<sup>-/-</sup> mice treated with treated anti-miR33<sup>pHLIP</sup> or Scr<sup>pHLIP</sup>.** **A**, Heatmap of the 20 most upregulated genes in each cluster defined in **Figure 5A** and selected enriched genes used for biological identification of each cluster. **B**, Distribution of cells extracted from the atherosclerotic aortas of anti-miR33<sup>pHLIP</sup> and Scr<sup>pHLIP</sup>-treated mice.

**Figure S10. Gene expression features from indicated monocytes/macrophages clusters.** **A**, Uniform manifold approximation and projection (UMAP) plots of *Cd14*, *Cd68*, *Adgre1*, and *Csf1r* in sorted cells from atherosclerotic plaques of mice treated with anti-miR33<sup>pHLIP</sup> or Scr<sup>pHLIP</sup>. **B**, UMAP plots of most highly upregulated genes for clusters of Trem2<sup>high</sup> Mac, F10<sup>+</sup> Mono, Inflammatory Mac and Stem-like Mac. **C**, UMAP plots of most highly upregulated genes for ECM<sup>high</sup> Mac cluster. Dot intensity values is represented in arbitrary unit in the Y axis.

**Table S1. Key resources used in this study.**

| <b>REAGENT or RESOURCE</b>                           | <b>SOURCE</b>     | <b>IDENTIFIER</b> |
|------------------------------------------------------|-------------------|-------------------|
| <b>Antibodies</b>                                    |                   |                   |
| anti-ABCA1                                           | Abcam             | ab18180           |
| anti-ABCG1                                           | Novus Biologicals | NB400-132         |
| anti-CD11b                                           | BioLegend         | #101212           |
| anti-CD31                                            | BioLegend         | #102422           |
| anti-CD45                                            | BioLegend         | #103112           |
| anti-CD68                                            | Serotec           | #MCA1957          |
| anti-CD115                                           | BioLegend         | #135506           |
| anti-F4/80                                           | BioLegend         | #123108           |
| anti-HSP90                                           | BD Biosciences    | #610419           |
| anti-Ly6-C                                           | BD Biosciences    | #128018           |
| anti-Ly6-G                                           | BioLegend         | #127613           |
| anti- $\alpha$ SMA                                   | Sigma-Aldrich     | #C6198            |
| Rat IgG2a negative control                           | Bio-Rad           | MCA1212           |
| FITC-conjugated Goat anti-Rat IgG                    | ThermoFisher      | #31629            |
| <b>Chemicals, Peptides, and Recombinant Proteins</b> |                   |                   |
| acLDL                                                | ThermoFisher      | L35354            |
| Recombinant human apolipoprotein AI                  | Abcam             | Ab50239           |
| [1,2- <sup>3</sup> H(N)]-Cholesterol                 | PerkinElmer       | NET139250UC       |
| Collagenase A                                        | Roche             | #11088785103      |
| Dil-acLDL                                            | ThermoFisher      | L3484             |
| Elastase                                             | Worthington       | LS006365          |
| eBioscience™ Fixable Viability Dye eFluor™ 450       | ThermoFisher      | #65-0863-14       |
| Oil-Red O                                            | Sigma-Aldrich     | O0625             |
| PMA                                                  | Sigma-Aldrich     | P1585             |
| RPMI 1640 medium                                     | ThermoFisher      | #21875034         |
| <b>Critical Commercial Assays</b>                    |                   |                   |
| ALT Activity Assay                                   | Sigma-Aldrich     | MAK052-1KT        |
| AST Activity Assay Kit                               | Sigma-Aldrich     | MAK055-1KT        |
| Cholesterol E                                        | Wako              | #999-02601        |

|                                               |                        |                                                                                 |
|-----------------------------------------------|------------------------|---------------------------------------------------------------------------------|
| L-Type Triglyceride M                         | Wako                   | #996-02895; #992-02995                                                          |
| HDL Cholesterol E                             | Wako                   | #431-52501                                                                      |
| DC™ protein assay kit                         | BioRad                 | #5000111                                                                        |
| CyQUANT™ MTT Cell Viability Assay             | Invitrogen             | V13154                                                                          |
| miR33 primers                                 | Qiagen                 | #339306, GeneGlobe YP00205690                                                   |
| U6 primers                                    | Qiagen                 | #339306, GeneGlobe YP02119464                                                   |
| RNeasy Mini Kit                               | Qiagen                 | #74104                                                                          |
| RNeasy MinElute Cleanup Kit                   | Qiagen                 | #74204                                                                          |
| Chromium Single Cell 3' v2                    | 10X Genomics           | #120237                                                                         |
| <b>Deposited Data</b>                         |                        |                                                                                 |
| Single cell RNA sequencing data               | This paper             | GEO (#GSE191220)                                                                |
| <b>Experimental Models: Cell Lines</b>        |                        |                                                                                 |
| THP-1                                         | ATCC                   | TIB-202                                                                         |
| <b>Experimental Models: Organisms/Strains</b> |                        |                                                                                 |
| Wild type mice                                | The Jackson Laboratory | 000664                                                                          |
| Ldlr knockout mice                            | The Jackson Laboratory | 002207                                                                          |
| <b>Software and Algorithms</b>                |                        |                                                                                 |
| FlowJo v10                                    | FlowJo, LLC            | <a href="https://www.flowjo.com/">https://www.flowjo.com/</a>                   |
| Prism 7.0                                     | GraphPad Software      | <a href="https://www.graphpad.com/">https://www.graphpad.com/</a>               |
| Image J v1.51                                 | NIH                    | <a href="https://imagej.nih.gov/ij/">https://imagej.nih.gov/ij/</a>             |
| CellRanger v2.1.1                             | 10x Genomics           | <a href="https://www.10xgenomics.com">https://www.10xgenomics.com</a>           |
| R v3.6.1                                      | R Core team            | <a href="http://www.R-project.org">www.R-project.org</a>                        |
| Seurat v3.2.0                                 | (Stuart et al., 2019)  | <a href="https://www.satijalab.org/seurat">https://www.satijalab.org/seurat</a> |
| Ingenuity® Pathways Analysis™ (IPA) v47547484 | Qiagen                 | <a href="https://www.qiagen.com/">https://www.qiagen.com/</a>                   |
| <b>Other</b>                                  |                        |                                                                                 |
| western diet (40% fat and 1.25% cholesterol)  | ResearchDiets          | D12108                                                                          |

**Table S2. Primer sequences for qPCR analysis.**

| <b>mRNA</b>  | <b>Primer sequences</b>                                       |
|--------------|---------------------------------------------------------------|
| <i>Abca1</i> | 5'-GGTTTGGAGATGGTTATACAATAGTTGT-3'<br>5'-CCCGGAAACGCAAGTCC-3' |
| <i>Gapdh</i> | 5'-AGGTCGGTGTGAACGGATTTG-3'<br>5'-TGTAGACCATGTAGTTGAGGTCA-3'  |

**Table S3. Differentially expressed genes (DEs) in Mono/Mac clusters.**

|               | <b>p_val</b> | <b>avg_logFC</b> | <b>Anti-miR33</b> | <b>Src</b> | <b>p_val_adj</b> |
|---------------|--------------|------------------|-------------------|------------|------------------|
| <b>H2-Eb1</b> | 1.85E-20     | 0.5095993        | 0.538             | 0.389      | 2.78E-16         |
| <b>H2-Aa</b>  | 5.60E-19     | 0.4614027        | 0.533             | 0.392      | 8.44E-15         |
| <b>Ly6e</b>   | 5.63E-19     | 0.4058898        | 0.517             | 0.391      | 8.48E-15         |
| <b>H2-Ab1</b> | 4.21E-16     | 0.4465454        | 0.573             | 0.461      | 6.34E-12         |
| <b>H2-K1</b>  | 8.52E-16     | 0.3204827        | 0.874             | 0.853      | 1.28E-11         |
| <b>Col1a2</b> | 9.92E-15     | 0.6335151        | 0.523             | 0.431      | 1.50E-10         |
| <b>Cd74</b>   | 2.89E-14     | 0.4368148        | 0.764             | 0.702      | 4.35E-10         |
| <b>Ifitm3</b> | 6.65E-14     | 0.3149755        | 0.561             | 0.45       | 1.00E-09         |
| <b>Timp3</b>  | 8.77E-13     | 0.3719783        | 0.333             | 0.232      | 1.32E-08         |
| <b>Comp</b>   | 7.69E-12     | 0.5019428        | 0.445             | 0.345      | 1.16E-07         |
| <b>Sparc</b>  | 9.89E-12     | 0.59755          | 0.973             | 0.973      | 1.49E-07         |
| <b>Mmp12</b>  | 4.36E-11     | -0.4083571       | 0.348             | 0.45       | 6.57E-07         |
| <b>Col1a1</b> | 5.49E-11     | 0.3609094        | 0.44              | 0.351      | 8.28E-07         |
| <b>Col3a1</b> | 2.30E-10     | 0.2562241        | 0.46              | 0.382      | 3.47E-06         |
| <b>Bgn</b>    | 6.61E-10     | 0.4516121        | 0.64              | 0.594      | 9.96E-06         |
| <b>Nupr1</b>  | 4.07E-09     | 0.2916874        | 0.6               | 0.552      | 6.13E-05         |
| <b>Col2a1</b> | 1.49E-07     | 0.8909633        | 0.425             | 0.364      | 2.25E-03         |
| <b>Fn1</b>    | 1.61E-06     | 0.3528053        | 0.675             | 0.631      | 2.43E-02         |
| <b>Bst2</b>   | 1.64E-06     | 0.297678         | 0.578             | 0.555      | 2.47E-02         |



**Table S4. Ingenuity pathway analysis from upregulated differentially genes in Mono/Mac clusters.**

| <b>Ingenuity Canonical Pathways</b>                         | <b>-log(p-value)</b> | <b>p value</b> | <b>Ratio</b> |
|-------------------------------------------------------------|----------------------|----------------|--------------|
| Dendritic Cell Maturation                                   | 11.7                 | 1.84E-12       | 0.0435       |
| Antigen Presentation Pathway                                | 9.76                 | 1.73E-10       | 0.128        |
| Apelin Liver Signaling Pathway                              | 8.19                 | 6.44E-09       | 0.154        |
| B Cell Development                                          | 7.6                  | 2.52E-08       | 0.111        |
| Intrinsic Prothrombin Activation Pathway                    | 7.32                 | 4.78E-08       | 0.0952       |
| Graft-versus-Host Disease Signaling                         | 7.08                 | 8.27E-08       | 0.0833       |
| Autoimmune Thyroid Disease Signaling                        | 7.05                 | 9E-08          | 0.0816       |
| Calcium-induced T Lymphocyte Apoptosis                      | 6.52                 | 3.03E-07       | 0.0606       |
| T Helper Cell Differentiation                               | 6.34                 | 4.56E-07       | 0.0548       |
| Hepatic Fibrosis / Hepatic Stellate Cell Activation         | 6.31                 | 4.88E-07       | 0.0269       |
| Natural Killer Cell Signaling                               | 6.19                 | 6.49E-07       | 0.0254       |
| IL-4 Signaling                                              | 6.07                 | 8.43E-07       | 0.0471       |
| Allograft Rejection Signaling                               | 6.05                 | 8.84E-07       | 0.0465       |
| Altered T Cell and B Cell Signaling in Rheumatoid Arthritis | 5.97                 | 1.06E-06       | 0.0444       |
| OX40 Signaling Pathway                                      | 5.97                 | 1.06E-06       | 0.0444       |
| PD-1, PD-L1 cancer immunotherapy pathway                    | 5.69                 | 2.04E-06       | 0.0377       |
| iCOS-iCOSL Signaling in T Helper Cells                      | 5.61                 | 2.46E-06       | 0.036        |
| Type I Diabetes Mellitus Signaling                          | 5.61                 | 2.46E-06       | 0.036        |
| GP6 Signaling Pathway                                       | 5.49                 | 3.24E-06       | 0.0336       |
| CD28 Signaling in T Helper Cells                            | 5.46                 | 3.47E-06       | 0.0331       |
| Th1 Pathway                                                 | 5.46                 | 3.47E-06       | 0.0331       |
| Atherosclerosis Signaling                                   | 5.38                 | 4.2E-06        | 0.0315       |
| Th2 Pathway                                                 | 5.26                 | 5.52E-06       | 0.0294       |
| PKC $\theta$ Signaling in T Lymphocytes                     | 5.03                 | 9.26E-06       | 0.0258       |
| Th1 and Th2 Activation Pathway                              | 4.87                 | 1.36E-05       | 0.0234       |
| T Cell Exhaustion Signaling Pathway                         | 4.83                 | 1.49E-05       | 0.0229       |
| Cdc42 Signaling                                             | 4.82                 | 1.53E-05       | 0.0227       |
| Tumor Microenvironment Pathway                              | 4.82                 | 1.53E-05       | 0.0227       |
| Role of NFAT in Regulation of the Immune Response           | 4.77                 | 1.71E-05       | 0.0221       |
| Osteoarthritis Pathway                                      | 4.44                 | 3.66E-05       | 0.0182       |
| Neuroinflammation Signaling Pathway                         | 3.91                 | 1.22E-04       | 0.0133       |
| MSP-RON Signaling In Macrophages Pathway                    | 3.89                 | 1.28E-04       | 0.0265       |
| Systemic Lupus Erythematosus In T Cell Signaling Pathway    | 3.74                 | 1.84E-04       | 0.012        |
| Hepatic Fibrosis Signaling Pathway                          | 3.54                 | 2.9E-04        | 0.0106       |
| Crosstalk between Dendritic Cells and Natural Killer Cells  | 2.56                 | 2.75E-03       | 0.0225       |

|                                                                                |       |          |         |
|--------------------------------------------------------------------------------|-------|----------|---------|
| Communication between Innate and Adaptive Immune Cells                         | 2.5   | 3.19E-03 | 0.0208  |
| Phagosome Maturation                                                           | 2.11  | 7.7E-03  | 0.0132  |
| HOTAIR Regulatory Pathway                                                      | 2.06  | 8.61E-03 | 0.0125  |
| Cytotoxic T Lymphocyte-mediated Apoptosis of Target Cells                      | 1.53  | 2.95E-02 | 0.0294  |
| MIF-mediated Glucocorticoid Regulation                                         | 1.53  | 2.95E-02 | 0.0294  |
| Interferon Signaling                                                           | 1.51  | 3.12E-02 | 0.0278  |
| Inhibition of Matrix Metalloproteases                                          | 1.47  | 3.38E-02 | 0.0256  |
| MIF Regulation of Innate Immunity                                              | 1.44  | 3.63E-02 | 0.0238  |
| Oncostatin M Signaling                                                         | 1.43  | 3.72E-02 | 0.0233  |
| Coronavirus Replication Pathway                                                | 1.41  | 3.89E-02 | 0.0222  |
| Caveolar-mediated Endocytosis Signaling                                        | 1.21  | 6.23E-02 | 0.0137  |
| Glioma Invasiveness Signaling                                                  | 1.21  | 6.23E-02 | 0.0137  |
| CTLA4 Signaling in Cytotoxic T Lymphocytes                                     | 1.12  | 7.55E-02 | 0.0112  |
| p53 Signaling                                                                  | 1.08  | 8.28E-02 | 0.0102  |
| Virus Entry via Endocytic Pathways                                             | 1.06  | 8.61E-02 | 0.0098  |
| Neuregulin Signaling                                                           | 1.05  | 8.85E-02 | 0.00952 |
| Neuroprotective Role of THOP1 in Alzheimer's Disease                           | 1.01  | 9.73E-02 | 0.00862 |
| IL-6 Signaling                                                                 | 0.979 | 1.05E-01 | 0.00794 |
| Phagosome Formation                                                            | 0.955 | 1.11E-01 | 0.00752 |
| Endocannabinoid Cancer Inhibition Pathway                                      | 0.924 | 1.19E-01 | 0.00699 |
| Acute Phase Response Signaling                                                 | 0.833 | 1.47E-01 | 0.00556 |
| ILK Signaling                                                                  | 0.81  | 1.55E-01 | 0.00526 |
| Agranulocyte Adhesion and Diapedesis                                           | 0.807 | 1.56E-01 | 0.00521 |
| Leukocyte Extravasation Signaling                                              | 0.804 | 1.57E-01 | 0.00518 |
| Role of Osteoblasts, Osteoclasts and Chondrocytes in Rheumatoid Arthritis      | 0.757 | 1.75E-01 | 0.00459 |
| Actin Cytoskeleton Signaling                                                   | 0.74  | 1.82E-01 | 0.00441 |
| Systemic Lupus Erythematosus Signaling                                         | 0.738 | 1.83E-01 | 0.00437 |
| Protein Ubiquitination Pathway                                                 | 0.668 | 2.15E-01 | 0.00366 |
| Role of Macrophages, Fibroblasts and Endothelial Cells in Rheumatoid Arthritis | 0.616 | 2.42E-01 | 0.00319 |
| Synaptogenesis Signaling Pathway                                               | 0.616 | 2.42E-01 | 0.00321 |

Note: P-value were calculated with Fisher's Exact Test and corrected based on the Benjamini-Hochberg method.

A

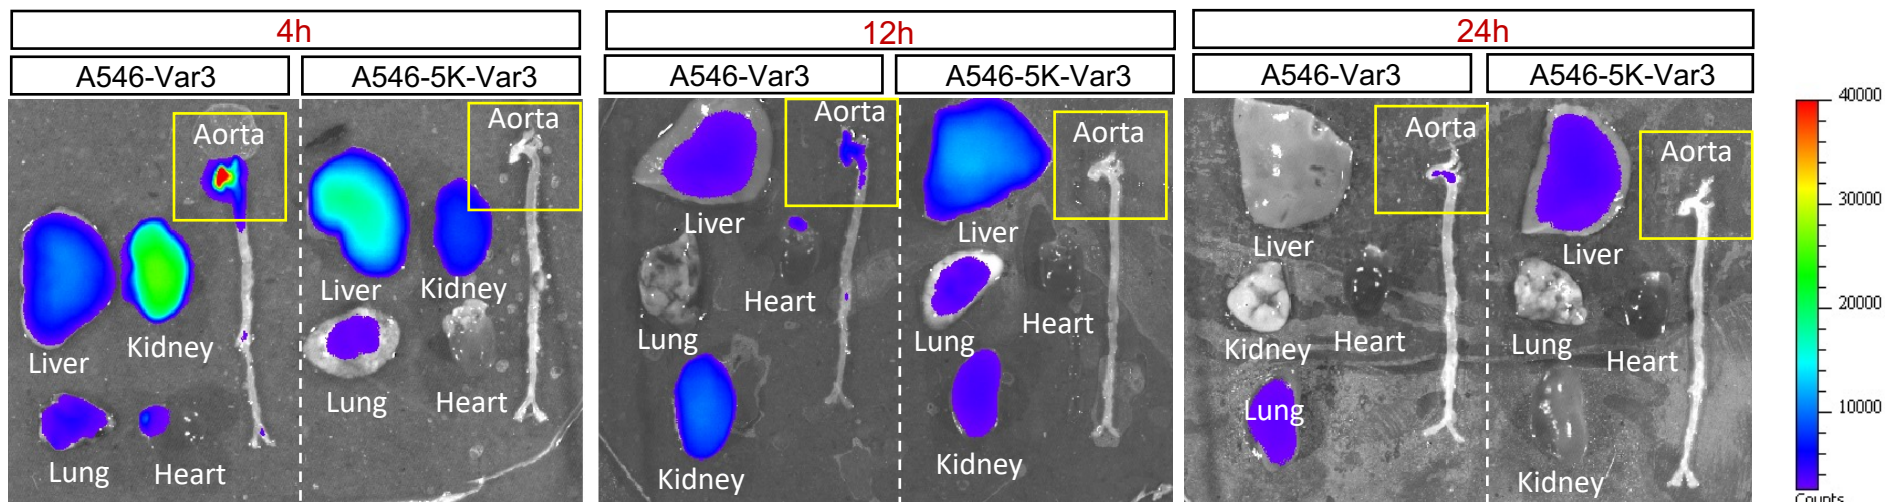

B

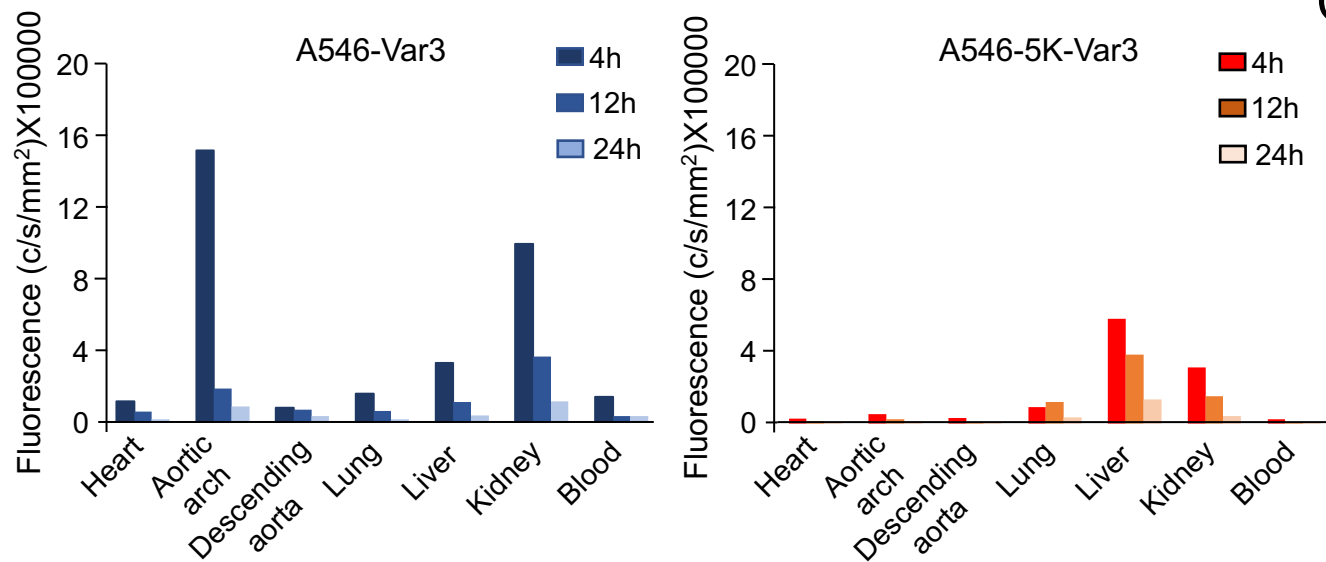

C

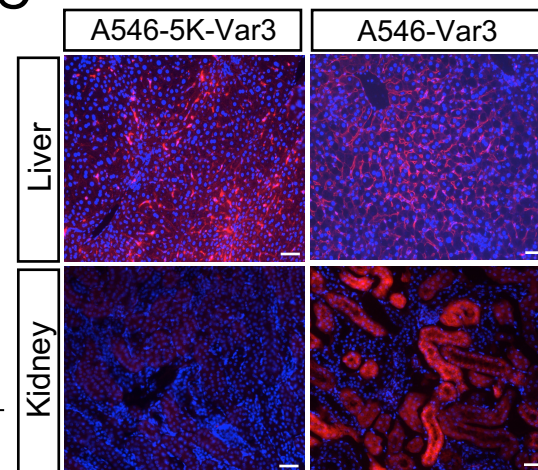

Figure S2

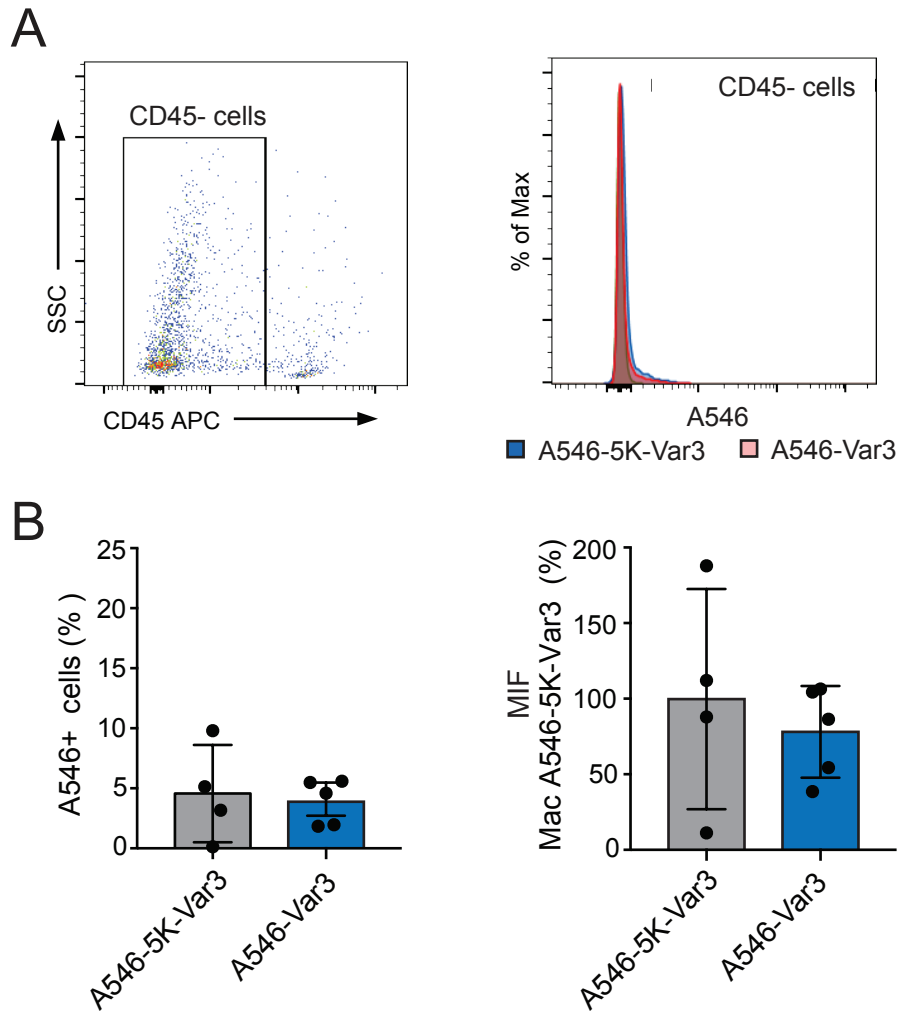

Figure S3

A

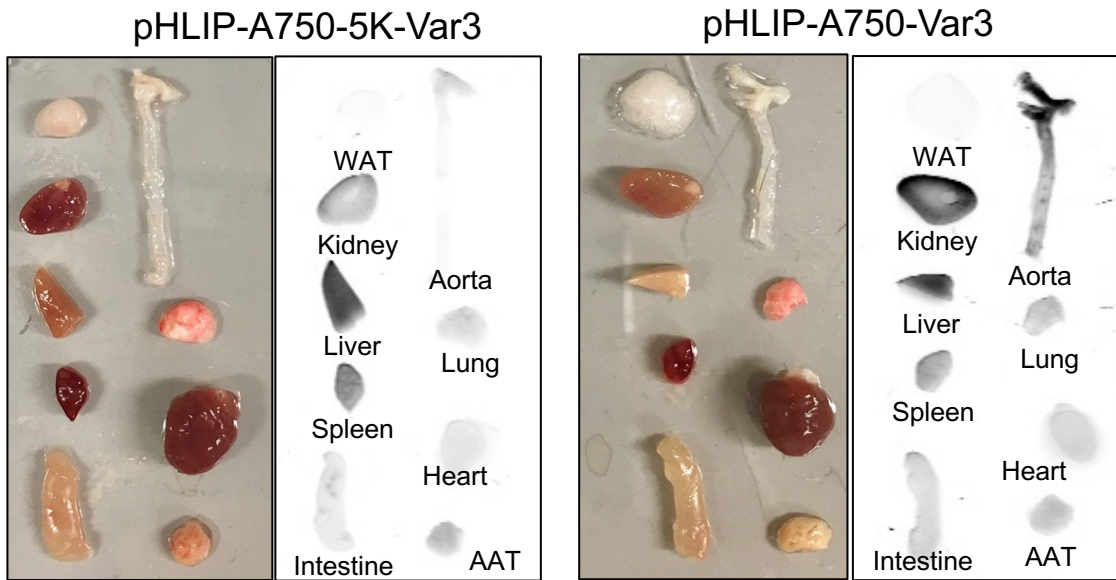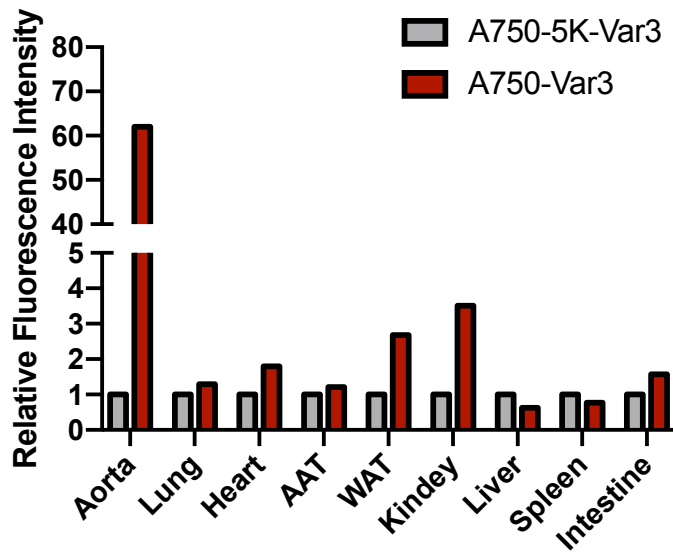

B

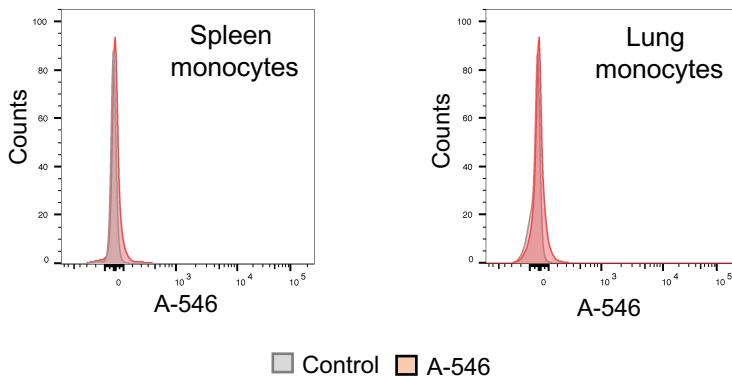

Figure S4

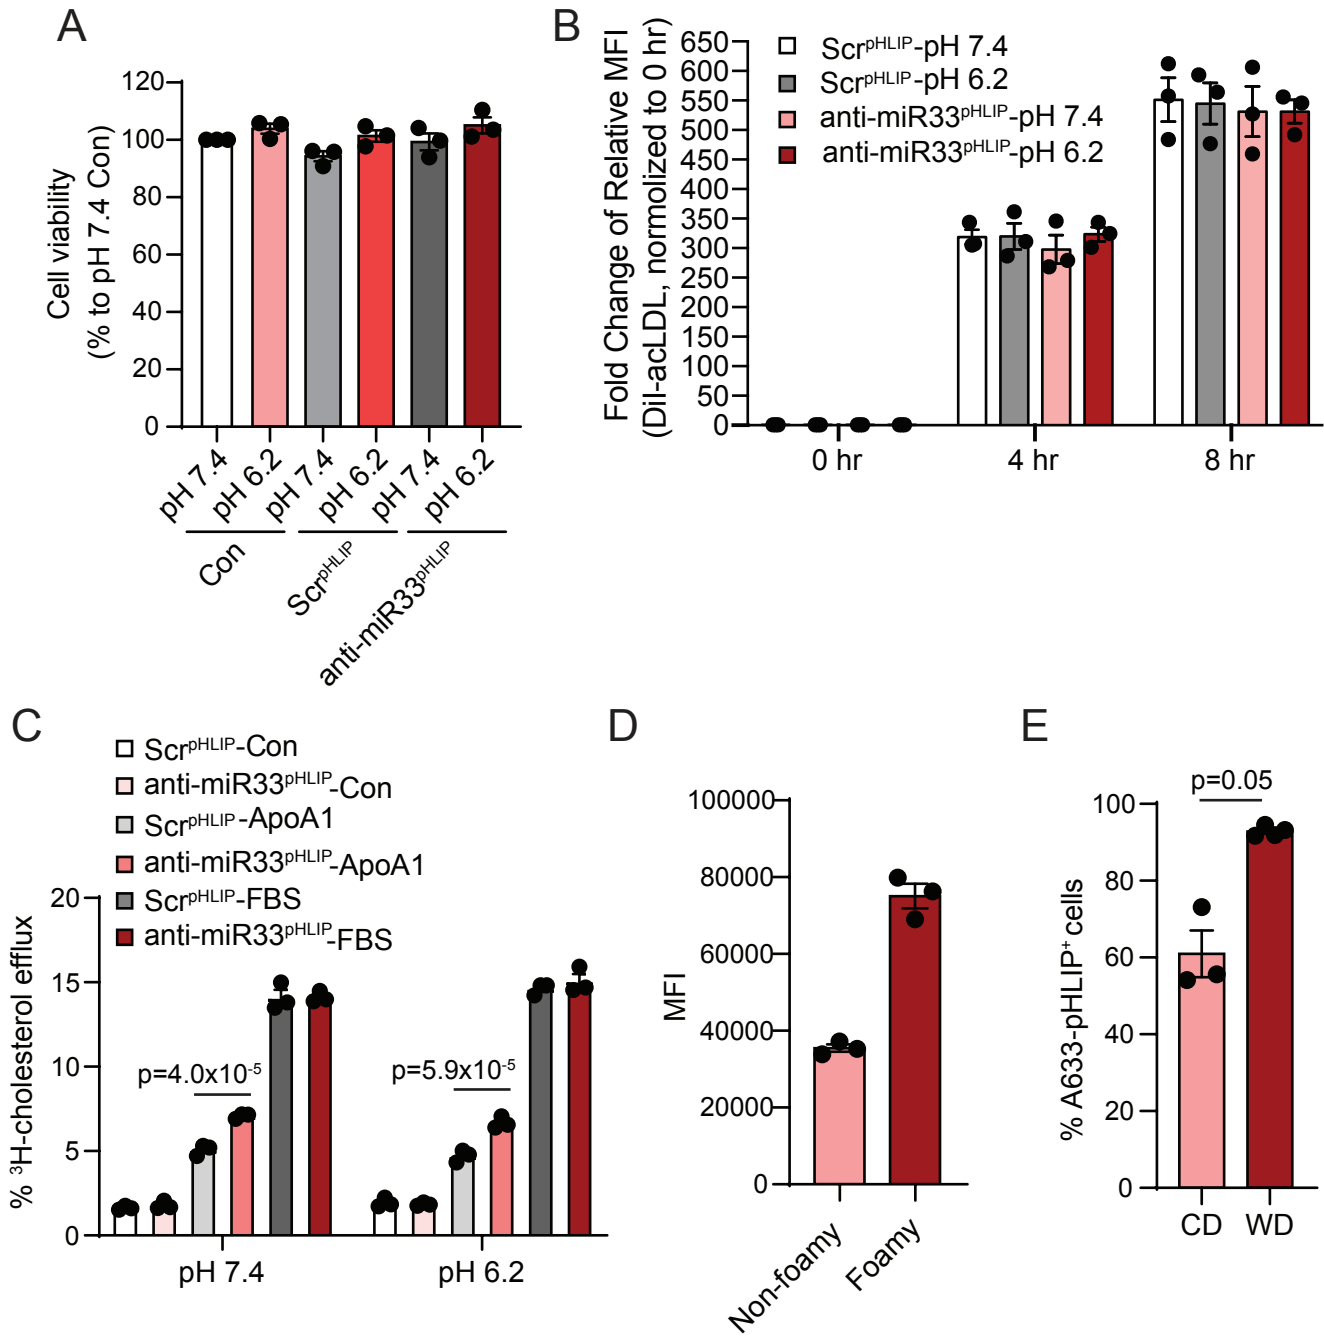

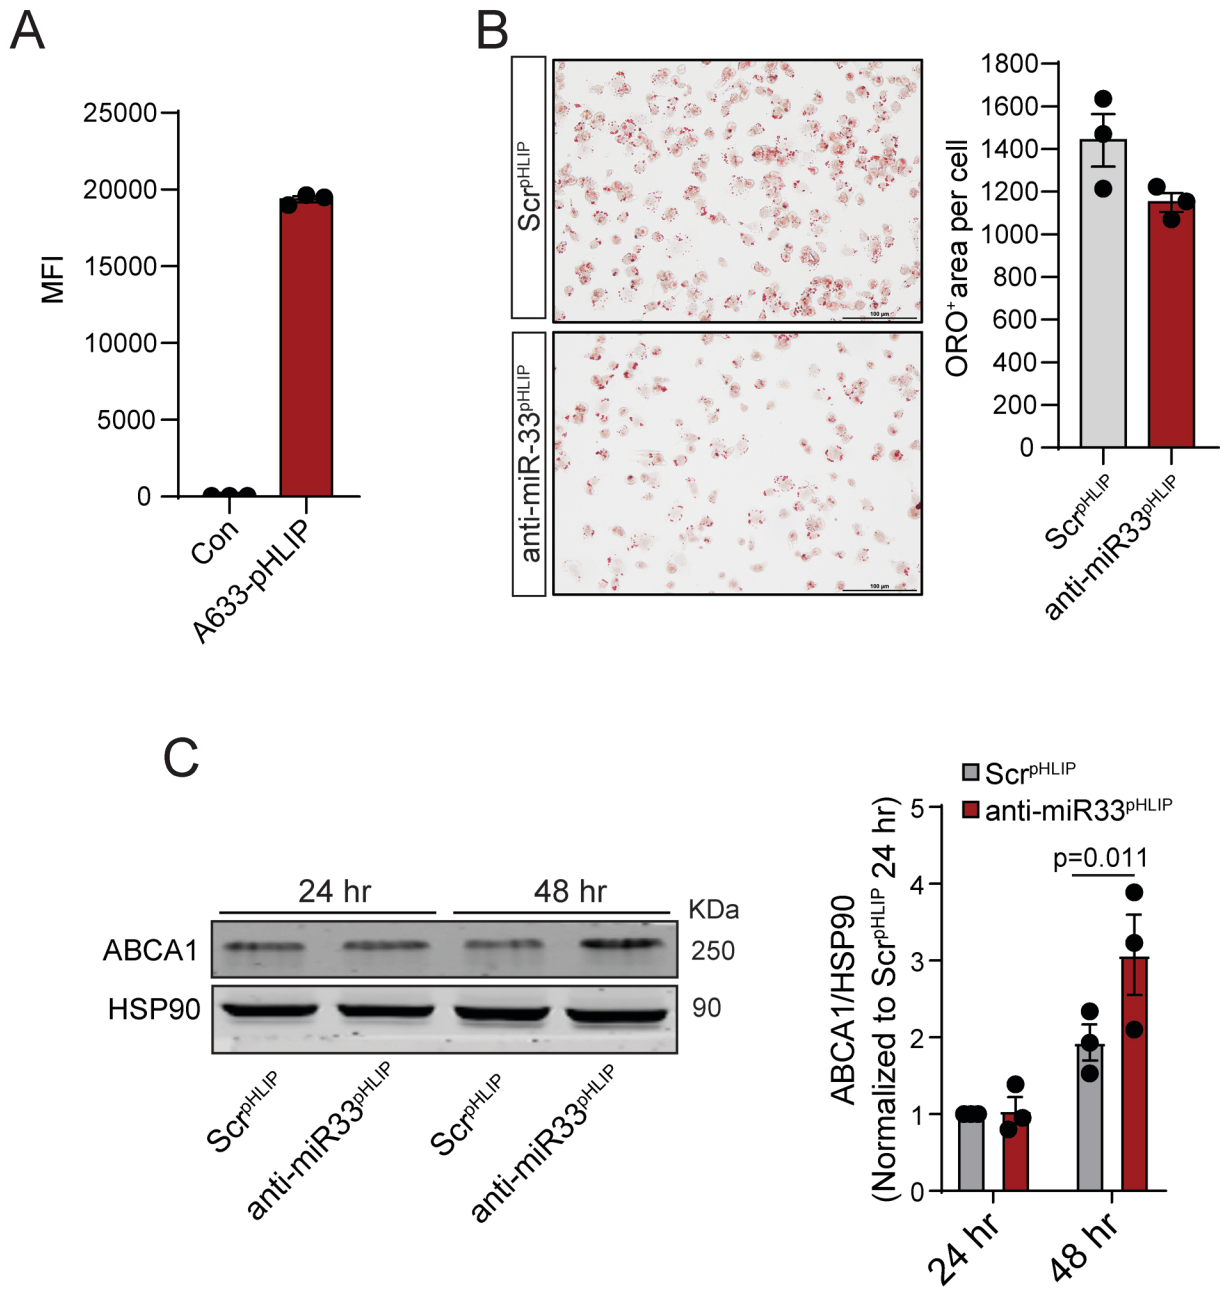

Figure S6

A

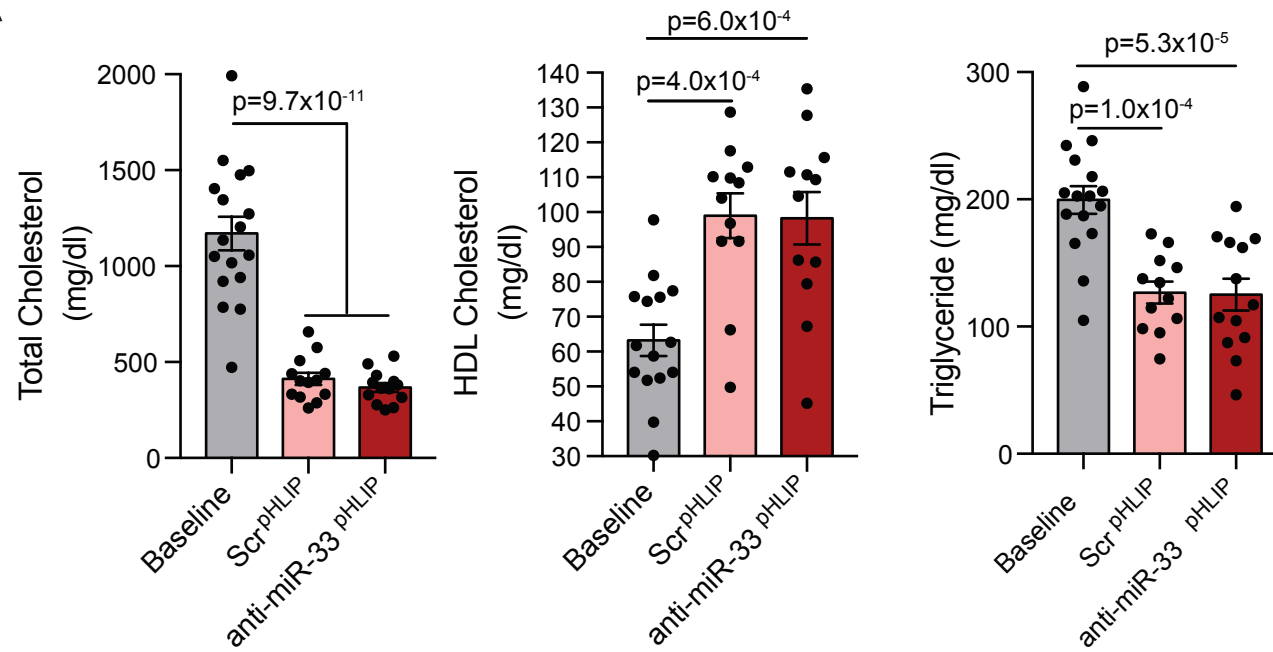

B

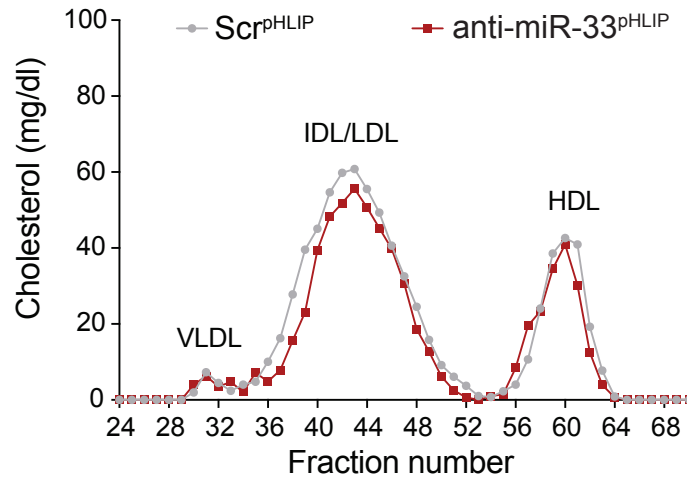

C

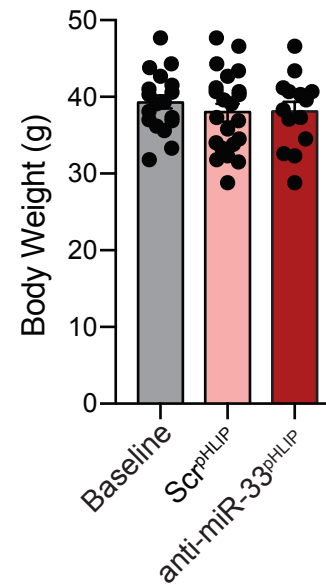



Figure S7

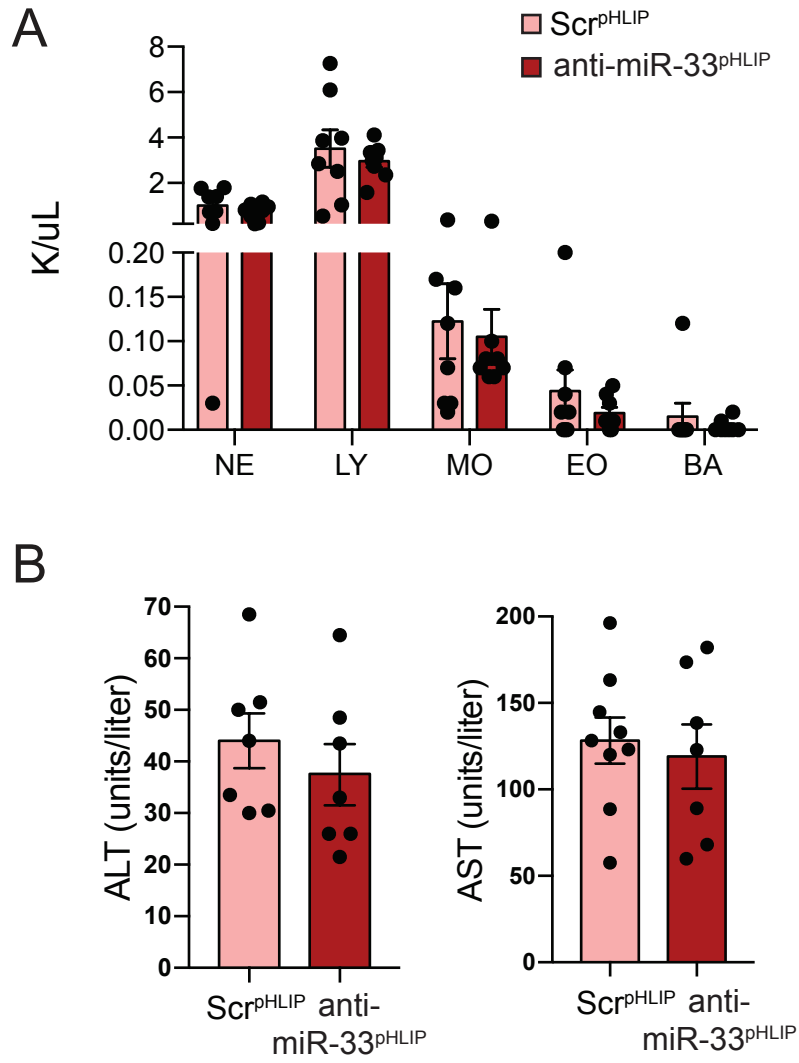

Figure S8

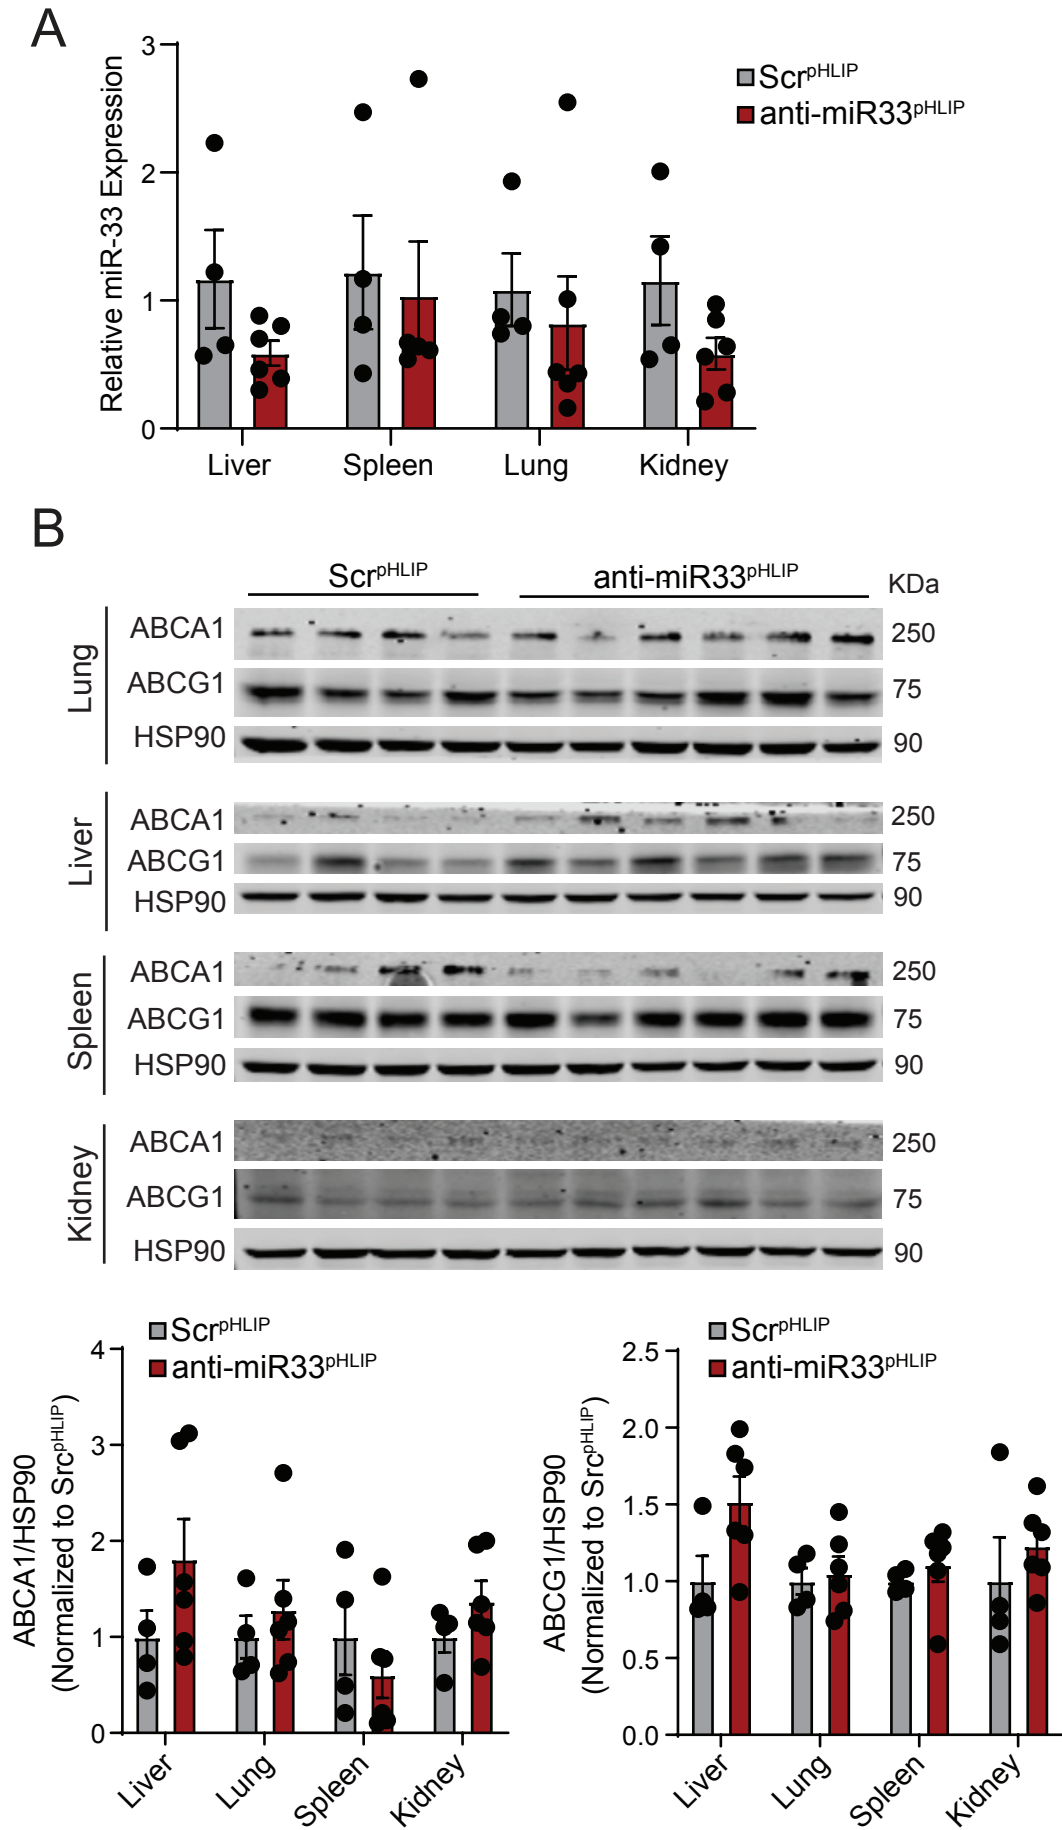

Figure S9

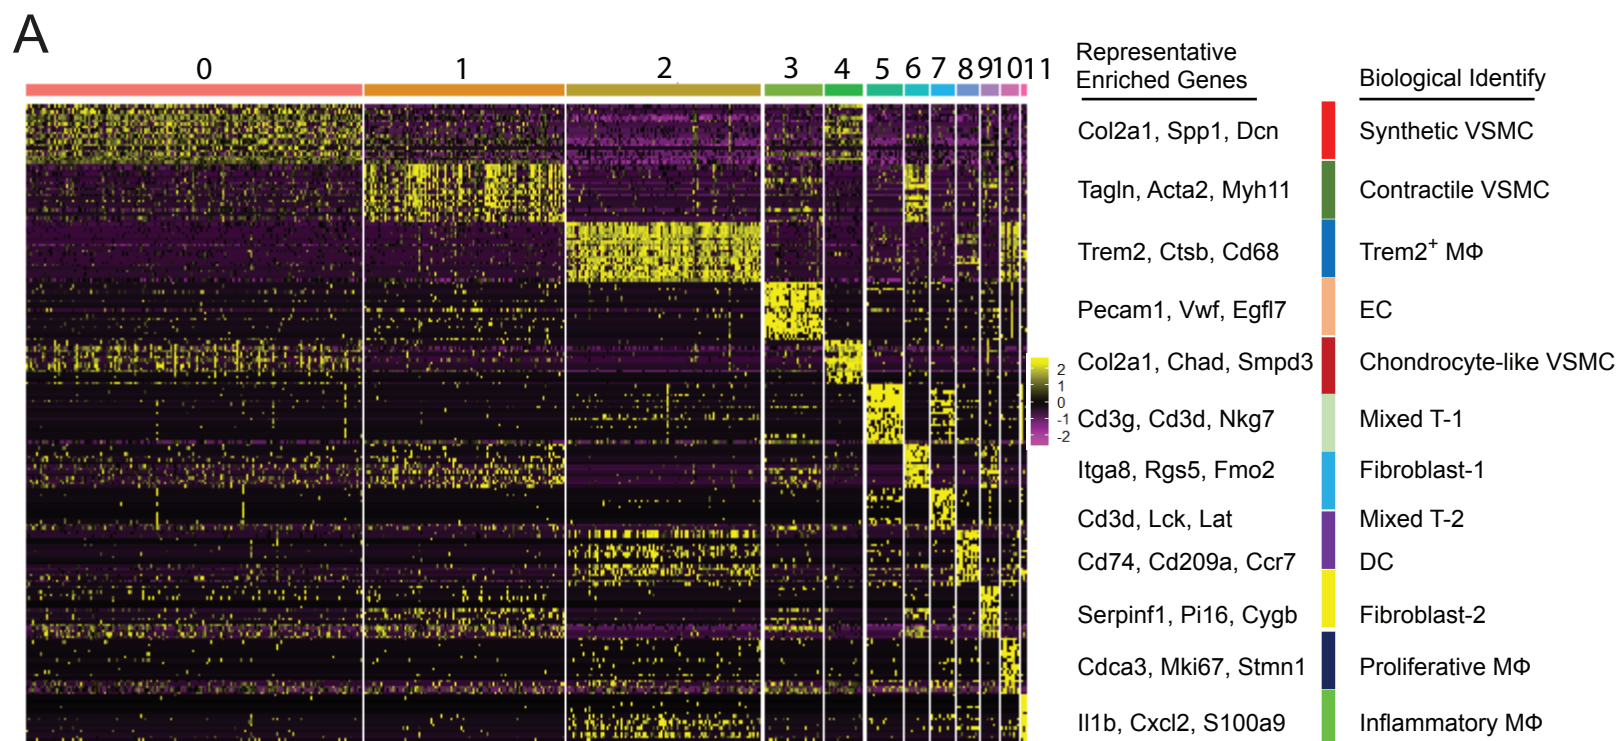

**B**

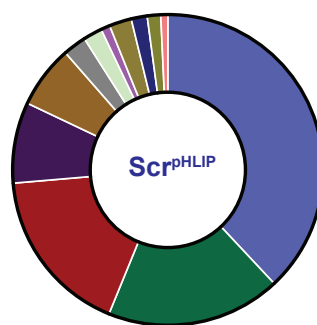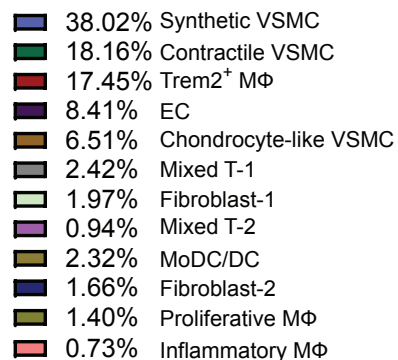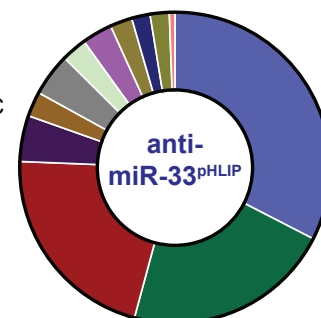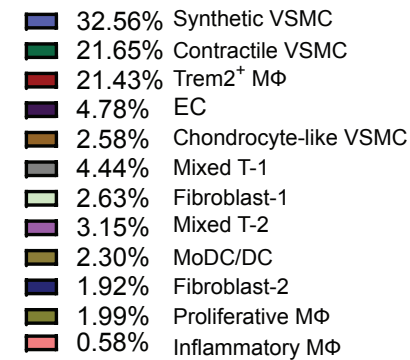

Figure S10

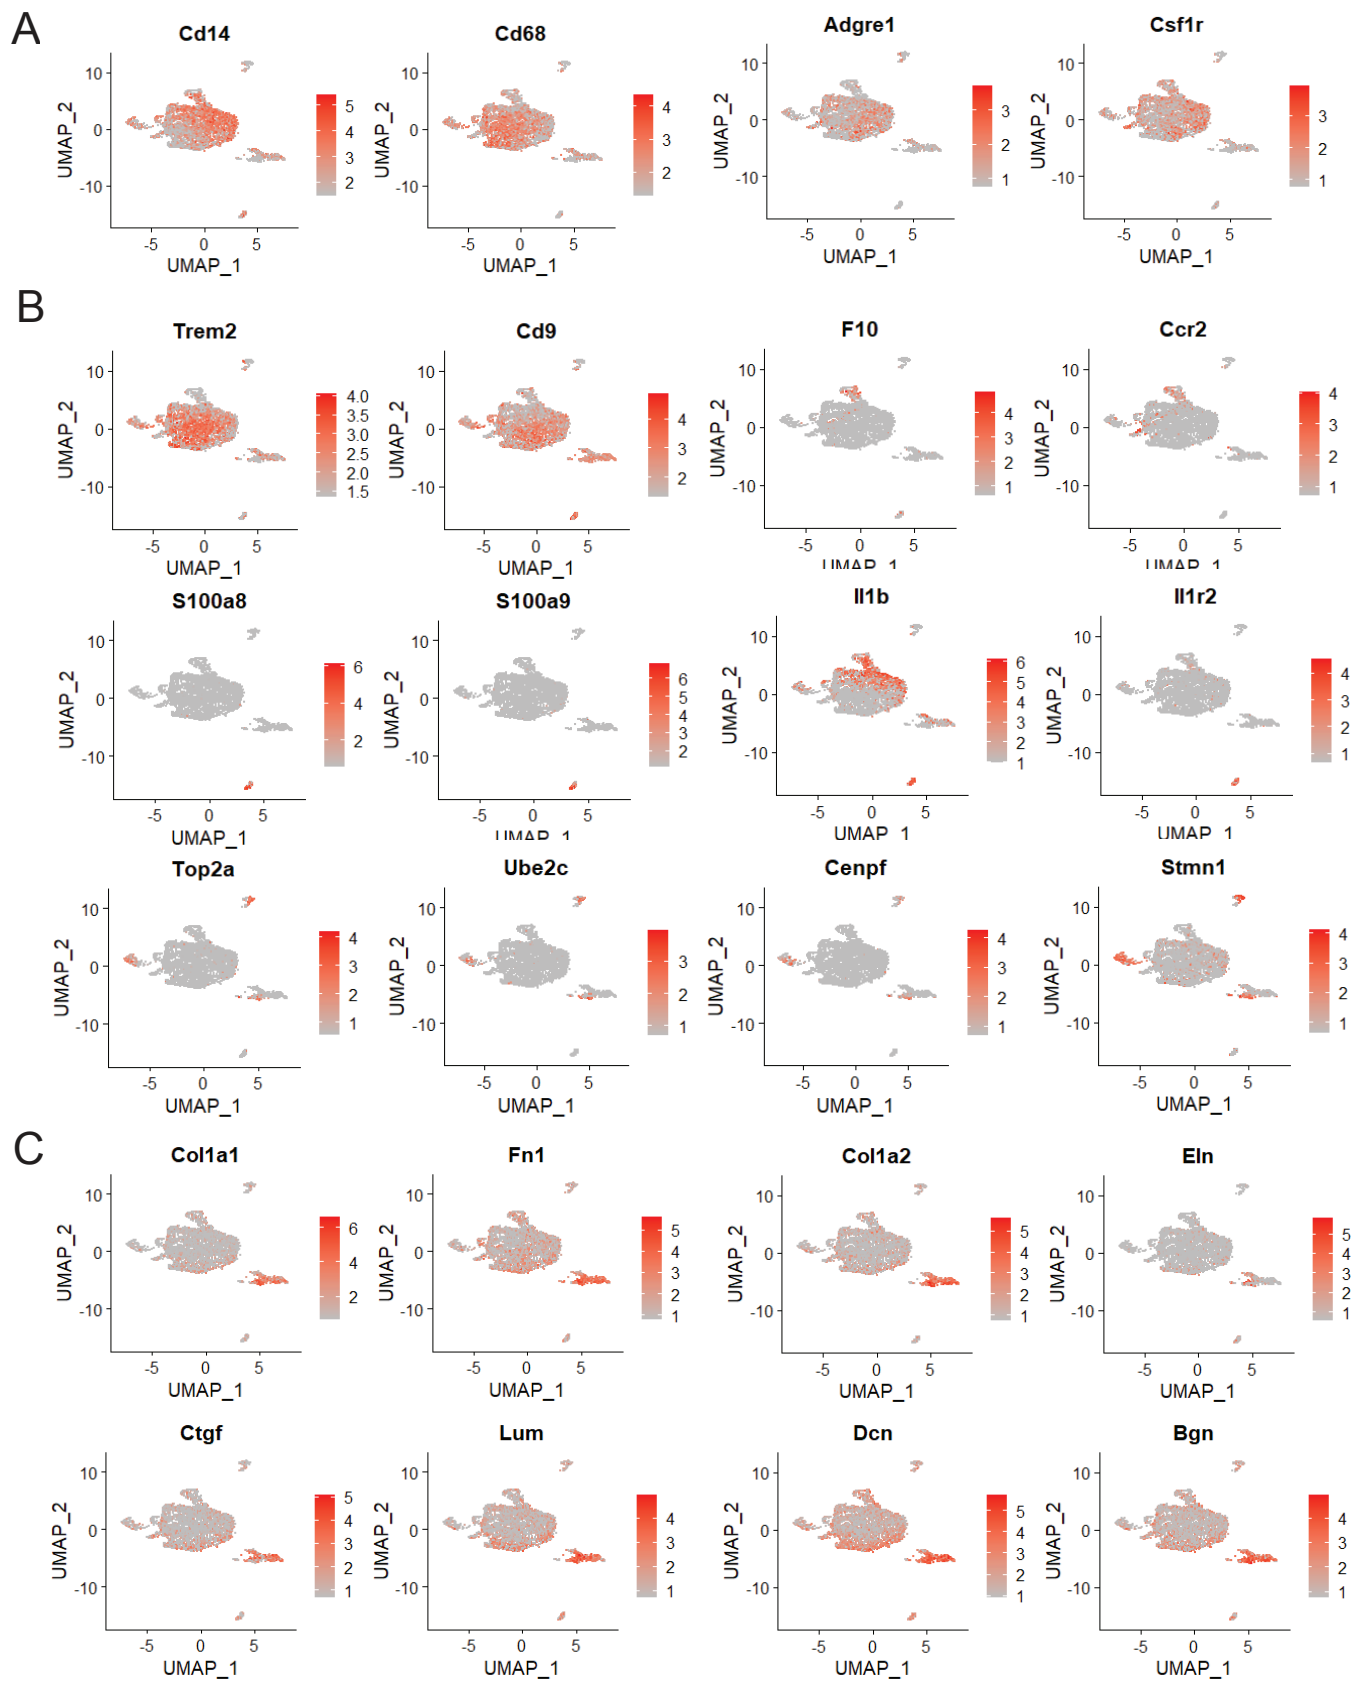

Supplement: NIHMS1804173-supplement-Supplemental_Material.pdf [file NIHMS1804173-supplement-Supplemental_Material.pdf]
