# Supplementary material
Source: PubMed Central journal article supplement (PMC9640270)
Supplement: NIHMS1804173-supplement-320296_Major_Resources_Table.pdf [file NIHMS1804173-supplement-320296_Major_Resources_Table.pdf]

## Major Resources Table

In order to allow validation and replication of experiments, all essential research materials listed in the Methods should be included in the Major Resources Table below. Authors are encouraged to use public repositories for protocols, data, code, and other materials and provide persistent identifiers and/or links to repositories when available. Authors may add or delete rows as needed.

### Animals (in vivo studies)

| Species | Vendor or Source       | Background Strain | Sex  | Persistent ID / URL                                                                     |
|---------|------------------------|-------------------|------|-----------------------------------------------------------------------------------------|
| Mouse   | The Jackson Laboratory | C57 BL/6J         | Male | <a href="https://www.jax.org/strain/cn/000664">https://www.jax.org/strain/cn/000664</a> |
| Mouse   | The Jackson Laboratory | Ldlr Knockout     | Both | <a href="https://www.jax.org/strain/002207">https://www.jax.org/strain/002207</a>       |
|         |                        |                   |      |                                                                                         |

### Genetically Modified Animals

|                 | Species | Vendor or Source | Background Strain | Other Information | Persistent ID / URL |
|-----------------|---------|------------------|-------------------|-------------------|---------------------|
| Parent - Male   |         |                  |                   |                   |                     |
| Parent - Female |         |                  |                   |                   |                     |

### Antibodies

| Target antigen | Vendor or Source  | Catalog # | Working concentration | Lot # (preferred but not required) | Persistent ID / URL                                                                                                                                                                                           |
|----------------|-------------------|-----------|-----------------------|------------------------------------|---------------------------------------------------------------------------------------------------------------------------------------------------------------------------------------------------------------|
| ABCA1          | Abcam             | ab18180   | 1:1000                |                                    | <a href="https://www.abcam.com/abca1-antibody-abh10-ab18180.html">https://www.abcam.com/abca1-antibody-abh10-ab18180.html</a>                                                                                 |
| ABCG1          | Novus Biologicals | NB400-132 | 1:1000                |                                    | <a href="https://www.novusbio.com/products/abcg1-antibody_nb400-132">https://www.novusbio.com/products/abcg1-antibody_nb400-132</a>                                                                           |
| CD115          | BioLegend         | #135523   | 1:100                 |                                    | <a href="https://www.biolegend.com/en-us/products/pe-cy7-anti-mouse-cd115-csf-1r-antibody-12376">https://www.biolegend.com/en-us/products/pe-cy7-anti-mouse-cd115-csf-1r-antibody-12376</a>                   |
| CD11b          | BioLegend         | #101223   | 1:100                 |                                    | <a href="https://www.biolegend.com/en-us/products/pacific-blue-anti-mouse-human-cd11b-antibody-3863">https://www.biolegend.com/en-us/products/pacific-blue-anti-mouse-human-cd11b-antibody-3863</a>           |
| CD11c          | BioLegend         | #371503   | 1:100                 |                                    | <a href="https://www.biolegend.com/en-us/products/pe-anti-human-cd11c-antibody-13285">https://www.biolegend.com/en-us/products/pe-anti-human-cd11c-antibody-13285</a>                                         |
| CD19           | BioLegend         | #115507   | 1:100                 |                                    | <a href="https://www.biolegend.com/en-us/products/pe-anti-mouse-cd19-antibody-1530">https://www.biolegend.com/en-us/products/pe-anti-mouse-cd19-antibody-1530</a>                                             |
| CD3            | BioLegend         | #100205   | 1:100                 |                                    | <a href="https://www.biolegend.com/en-us/products/pe-anti-mouse-cd3-antibody-47">https://www.biolegend.com/en-us/products/pe-anti-mouse-cd3-antibody-47</a>                                                   |
| CD68           | Serotec           | #MCA1957  | 1:500                 |                                    | <a href="https://www.bio-rad-antibodies.com/monoclonal/mouse-cd68-antibody-fa-11-mca1957.html?f=purified">https://www.bio-rad-antibodies.com/monoclonal/mouse-cd68-antibody-fa-11-mca1957.html?f=purified</a> |
| CD90.2         | BioLegend         | #140307   | 1:100                 |                                    | <a href="https://www.biolegend.com/en-us/products/pe-anti-mouse-cd90-2-thy-1-2-antibody-6867">https://www.biolegend.com/en-us/products/pe-anti-mouse-cd90-2-thy-1-2-antibody-6867</a>                         |
| F4/80          | BioLegend         | #123123   | 1:100                 |                                    | <a href="https://www.biolegend.com/en-us/products/pacific-blue-anti-mouse-f4-80-antibody-4075">https://www.biolegend.com/en-us/products/pacific-blue-anti-mouse-f4-80-antibody-4075</a>                       |

DOI [to be added]

|        |                |         |        |  |                                                                                                                                                                                                                                                                                                                                                                             |
|--------|----------------|---------|--------|--|-----------------------------------------------------------------------------------------------------------------------------------------------------------------------------------------------------------------------------------------------------------------------------------------------------------------------------------------------------------------------------|
| HSP90  | BD Biosciences | #610419 | 1:1000 |  | <a href="https://www.bdbiosciences.com/us/applications/research/apoptosis/purified-antibodies/purified-mouse-anti-hsp90-68hsp90/p/610419">https://www.bdbiosciences.com/us/applications/research/apoptosis/purified-antibodies/purified-mouse-anti-hsp90-68hsp90/p/610419</a>                                                                                               |
| Ly6C   | BD Biosciences | #553104 | 1:100  |  | <a href="https://www.bdbiosciences.com/us/reagents/research/antibodies-buffers/immunology-reagents/anti-mouse-antibodies/cell-surface-antigens/fitc-rat-anti-mouse-ly-6c-al-21/p/553104">https://www.bdbiosciences.com/us/reagents/research/antibodies-buffers/immunology-reagents/anti-mouse-antibodies/cell-surface-antigens/fitc-rat-anti-mouse-ly-6c-al-21/p/553104</a> |
| Ly6G   | BioLegend      | #127607 | 1:100  |  | <a href="https://www.biolegend.com/en-us/products/pe-anti-mouse-ly-6g-antibody-4777">https://www.biolegend.com/en-us/products/pe-anti-mouse-ly-6g-antibody-4777</a>                                                                                                                                                                                                         |
| Ly6G   | BioLegend      | #127613 | 1:100  |  | <a href="https://www.biolegend.com/en-us/products/apc-anti-mouse-ly-6g-antibody-6115">https://www.biolegend.com/en-us/products/apc-anti-mouse-ly-6g-antibody-6115</a>                                                                                                                                                                                                       |
| NK1.1  | BioLegend      | #108707 | 1:100  |  | <a href="https://www.biolegend.com/en-us/products/pe-anti-mouse-nk-1-1-antibody-431">https://www.biolegend.com/en-us/products/pe-anti-mouse-nk-1-1-antibody-431</a>                                                                                                                                                                                                         |
| SMA    | Sigma          | #C6198  | 1:1000 |  | <a href="https://www.sigmaaldrich.com/catalog/product/sigma/c6198?lang=en&amp;region=US">https://www.sigmaaldrich.com/catalog/product/sigma/c6198?lang=en&amp;region=US</a>                                                                                                                                                                                                 |
| Ter119 | BioLegend      | #116207 | 1:100  |  | <a href="https://www.biolegend.com/en-us/products/pe-anti-mouse-ter-119-erythroid-cells-antibody-1867">https://www.biolegend.com/en-us/products/pe-anti-mouse-ter-119-erythroid-cells-antibody-1867</a>                                                                                                                                                                     |

#### DNA/cDNA Clones

| Clone Name | Sequence | Source / Repository | Persistent ID / URL |
|------------|----------|---------------------|---------------------|
|            |          |                     |                     |
|            |          |                     |                     |
|            |          |                     |                     |

#### Cultured Cells

| Name               | Vendor or Source    | Sex (F, M, or unknown) | Persistent ID / URL |
|--------------------|---------------------|------------------------|---------------------|
| Primary macrophage | Isolated in the lab | Both                   |                     |
|                    |                     |                        |                     |
|                    |                     |                        |                     |

#### Data & Code Availability

| Description | Source / Repository | Persistent ID / URL                    |
|-------------|---------------------|----------------------------------------|
| scRNAseq    | GEO                 | Will deposit in GEO before publication |
|             |                     |                                        |
|             |                     |                                        |

#### Other

| Description             | Source / Repository | Persistent ID / URL                                                                                                                                                               |
|-------------------------|---------------------|-----------------------------------------------------------------------------------------------------------------------------------------------------------------------------------|
| Western Diet (#D12108C) | Research Diets      | <a href="https://researchdiets.com/formulas/d12108c">https://researchdiets.com/formulas/d12108c</a>                                                                               |
| Aldrithiol-2 (#143049)  | Sigma               | <a href="https://www.sigmaaldrich.com/catalog/product/aldrich/143049?lang=en&amp;region=US">https://www.sigmaaldrich.com/catalog/product/aldrich/143049?lang=en&amp;region=US</a> |

|                                           |             |                                                                                                                                                                                                                                                                                                                                           |
|-------------------------------------------|-------------|-------------------------------------------------------------------------------------------------------------------------------------------------------------------------------------------------------------------------------------------------------------------------------------------------------------------------------------------|
| Collagenase XI (C7657)                    | Sigma       | <a href="https://www.sigmaaldrich.com/catalog/product/sigma/c7657?lang=en&amp;region=US">https://www.sigmaaldrich.com/catalog/product/sigma/c7657?lang=en&amp;region=US</a>                                                                                                                                                               |
| DNAse I (DN25)                            | Sigma       | <a href="https://www.sigmaaldrich.com/catalog/product/sigma/dn25?lang=en&amp;region=US">https://www.sigmaaldrich.com/catalog/product/sigma/dn25?lang=en&amp;region=US</a>                                                                                                                                                                 |
| Hyaluronidase (H3506)                     | Sigma       | <a href="https://www.sigmaaldrich.com/catalog/product/sigma/h3506?lang=en&amp;region=US">https://www.sigmaaldrich.com/catalog/product/sigma/h3506?lang=en&amp;region=US</a>                                                                                                                                                               |
| Fc Block (#553141)                        | BD          | <a href="https://www.bdbiosciences.com/us/applications/research/b-cell-research/surface-markers/mouse/purified-rat-anti-mouse-cd16cd32-mouse-bd-fc-block-24g2/p/553141">https://www.bdbiosciences.com/us/applications/research/b-cell-research/surface-markers/mouse/purified-rat-anti-mouse-cd16cd32-mouse-bd-fc-block-24g2/p/553141</a> |
| Collagenase A (#10103586001)              | Sigma       | <a href="https://www.sigmaaldrich.com/catalog/product/roche/collaro?lang=en&amp;region=US">https://www.sigmaaldrich.com/catalog/product/roche/collaro?lang=en&amp;region=US</a>                                                                                                                                                           |
| Elastase (#LS006365)                      | Worthington | <a href="http://www.worthington-biochem.com/es/pl.html">http://www.worthington-biochem.com/es/pl.html</a>                                                                                                                                                                                                                                 |
| Oil Red O (O0625)                         | Sigma       | <a href="https://www.sigmaaldrich.com/catalog/product/sial/o0625?lang=en&amp;region=US">https://www.sigmaaldrich.com/catalog/product/sial/o0625?lang=en&amp;region=US</a>                                                                                                                                                                 |
| Protease inhibitor cocktail (11697498001) | Roche       | <a href="https://www.sigmaaldrich.com/catalog/product/roche/coro?lang=en&amp;region=US">https://www.sigmaaldrich.com/catalog/product/roche/coro?lang=en&amp;region=US</a>                                                                                                                                                                 |
| DC Protein assay kit (5000111)            | Bio-Rad     | <a href="https://www.bio-rad.com/en-us/product/dc-protein-assay?ID=22faf97a-6b8d-4763-8b97-3dc530dcab66">https://www.bio-rad.com/en-us/product/dc-protein-assay?ID=22faf97a-6b8d-4763-8b97-3dc530dcab66</a>                                                                                                                               |
| iScript RT Supermix (1708841)             | Bio-Rad     | <a href="https://www.bio-rad.com/en-us/product/iscript-reverse-transcription-supermix-for-rt-qpcr?ID=M87EVMKG4">https://www.bio-rad.com/en-us/product/iscript-reverse-transcription-supermix-for-rt-qpcr?ID=M87EVMKG4</a>                                                                                                                 |
| SsoFast EvaGreen Supermixes (1725201)     | Bio-Rad     | <a href="https://www.bio-rad.com/en-us/product/ssofast-evagreen-supermixes?ID=MH5HL6MNI">https://www.bio-rad.com/en-us/product/ssofast-evagreen-supermixes?ID=MH5HL6MNI</a>                                                                                                                                                               |
| miRNeasy Mini Kit (217004)                | Qiagen      | <a href="https://www.qiagen.com/us/products/discovery-translational-research/dna-rna-purification/rna-purification/mirna/mirneasy-mini-kit/#orderinginformation">https://www.qiagen.com/us/products/discovery-translational-research/dna-rna-purification/rna-purification/mirna/mirneasy-mini-kit/#orderinginformation</a>               |
