# Supplementary material
Source: PubMed Central journal article supplement (PMC9640270)

Figure 2D

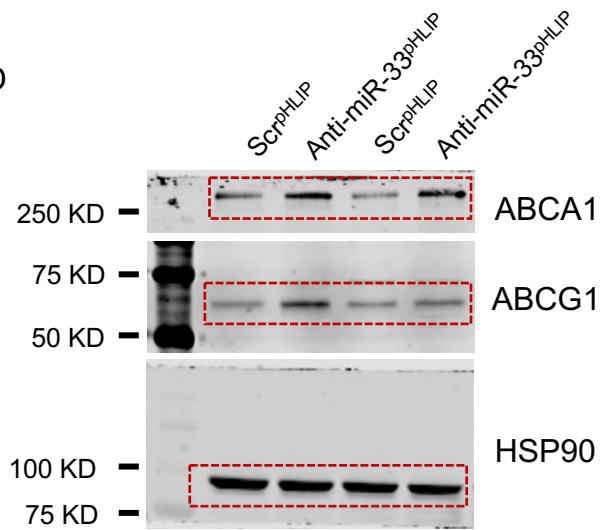

Figure IV

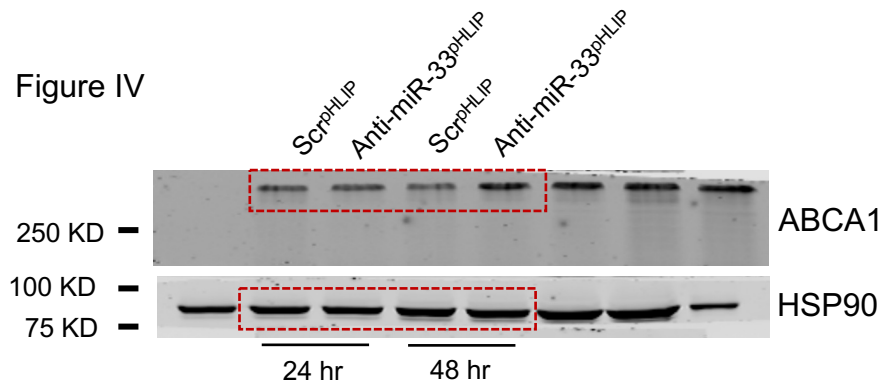

Figure VII

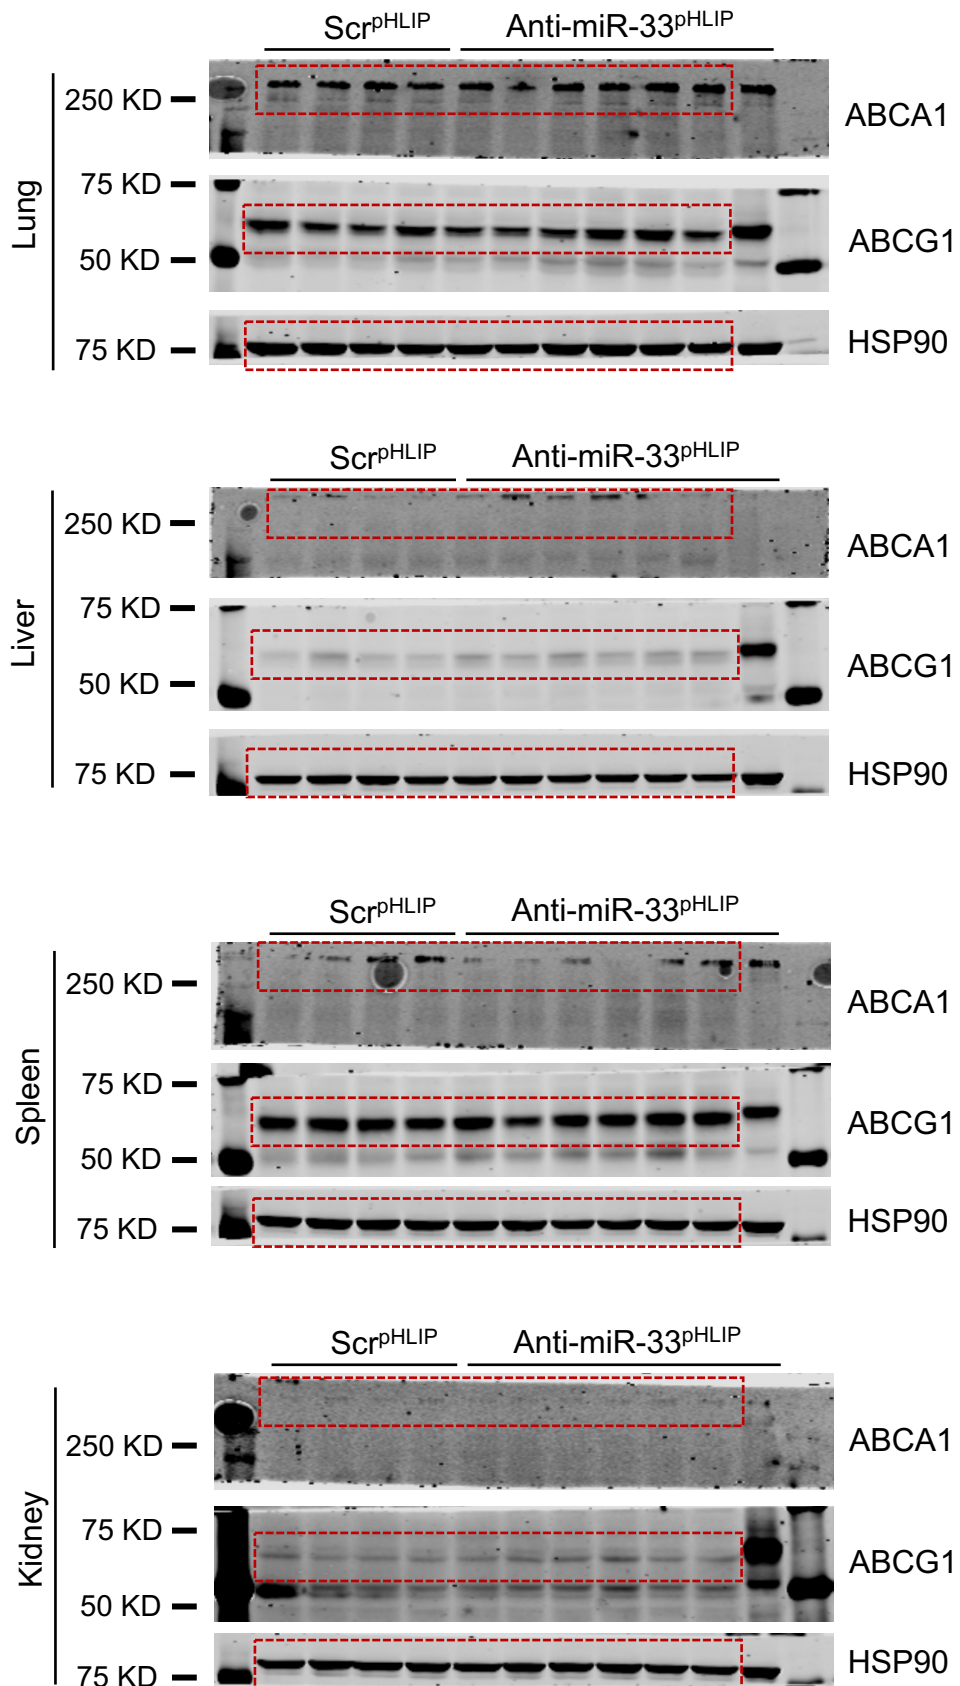

Supplement: NIHMS1804173-supplement-320296_Uncut_Gel_Blots.pdf [file NIHMS1804173-supplement-320296_Uncut_Gel_Blots.pdf]
